# Supplementary material for: Efficient one-step synthesis of trialkylsubstituted 2(5H)-furanones utilizing direct Ti-crossed aldol condensation and its application to the straightforward synthesis of (R)-mintlactone and (R)-menthofuranElectronic supplementary information (ESI) available: calculated structures of 7 and 8. See http://www.rsc.org/suppdata/cc/b2/b208077j/
Source: Royal Society of Chemistry journal article supplement (doi:10.1039/b208077j), 2002-10-01
Supplement: b208077j.doc [file b208077j.doc]

Calculation was performed by SPARTAN ’02 windows (Wavefunction, Inc., Irvine, CA), Hartree-Fock, 6-31G*.

mintlactone (**7**)　　　　　　　　 isomintlactone (**8**)
